# Supplementary material for: Realizing red/orange emission of Eu2+/Ce3+ in La26−xSrxSi41Ox+1N80−x (x = 12.72–12.90) phosphors for high color rendition white LEDs
Source: Royal Society of Chemistry journal article supplement (doi:10.1039/d0tc03585h), 2020-01-01
Supplement: d0tc03585h1.pdf [file d0tc03585h1.pdf]

## Supporting Information

### **Realizing red/orange emission of $\text{Eu}^{2+}/\text{Ce}^{3+}$ in $\text{La}_{26-x}\text{Sr}_x\text{Si}_{41}\text{O}_{x+1}\text{N}_{80-x}$ : ( $x = 12.72\text{-}12.90$ ) phosphors for high color rendition white LEDs**

Yingxue Zhang<sup>a</sup>, Shuxing Li<sup>a\*</sup>, Takashi Takeda<sup>b</sup>, Shiro Funahashi<sup>b</sup>, Naoto Hirosaki<sup>b</sup>, and Rong-Jun Xie<sup>a\*</sup>

<sup>a</sup> College of Materials, Xiamen University, Xiamen, Fujian 361005, China.

<sup>b</sup> Sialon Unit, National Institute for Materials Science, Tsukuba 305-0044, Japan.

Corresponding authors' email: [rjxie@xmu.edu.cn](mailto:rjxie@xmu.edu.cn), [lishuxing@xmu.edu.cn](mailto:lishuxing@xmu.edu.cn).

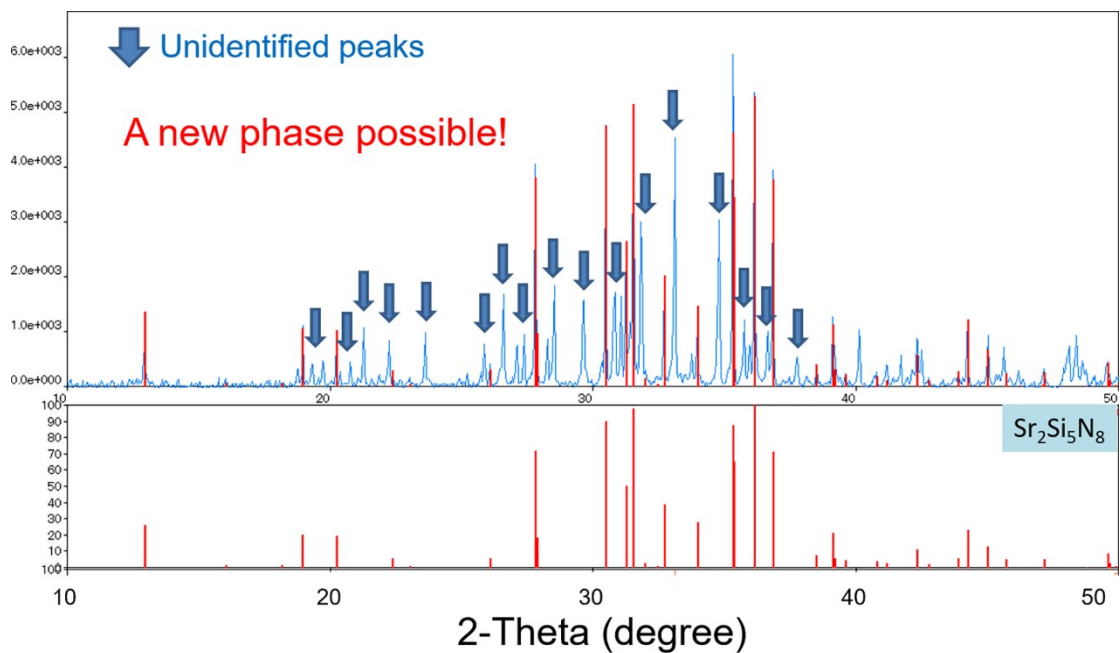

Figure S1. XRD comparison patterns of synthesized powder and  $\text{Sr}_2\text{Si}_5\text{N}_8$  phase.

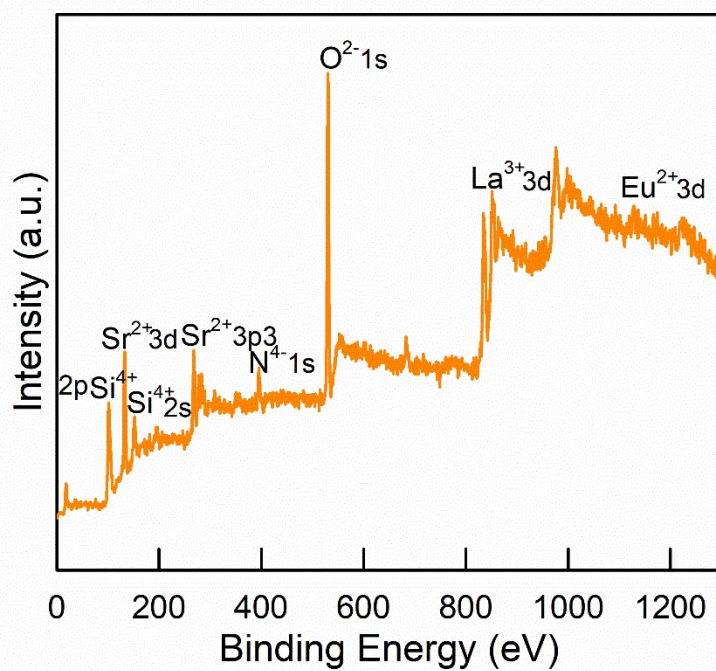

Figure S2. XPS full spectra of all elements (La, Sr, Si, O, N and Eu) regions in  $\text{LSSON:Eu}^{2+}$  ( $x = 12.90$ ).

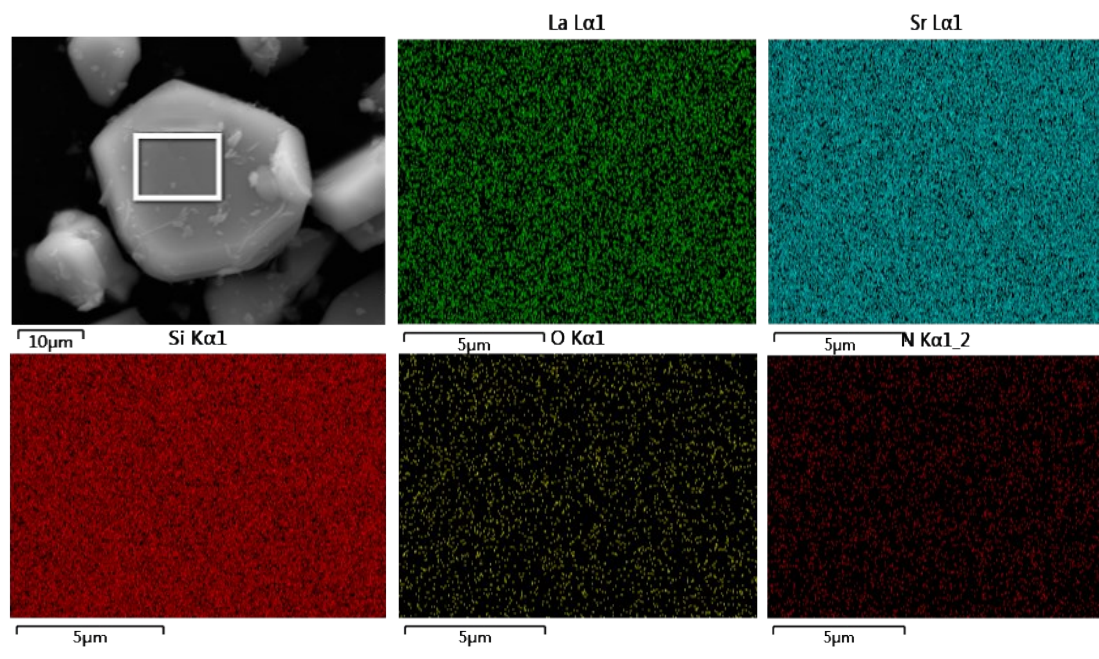

Figure S3. Scanning electron microscopy (SEM) image and EDS mapping of La, Sr, Si, O and N.

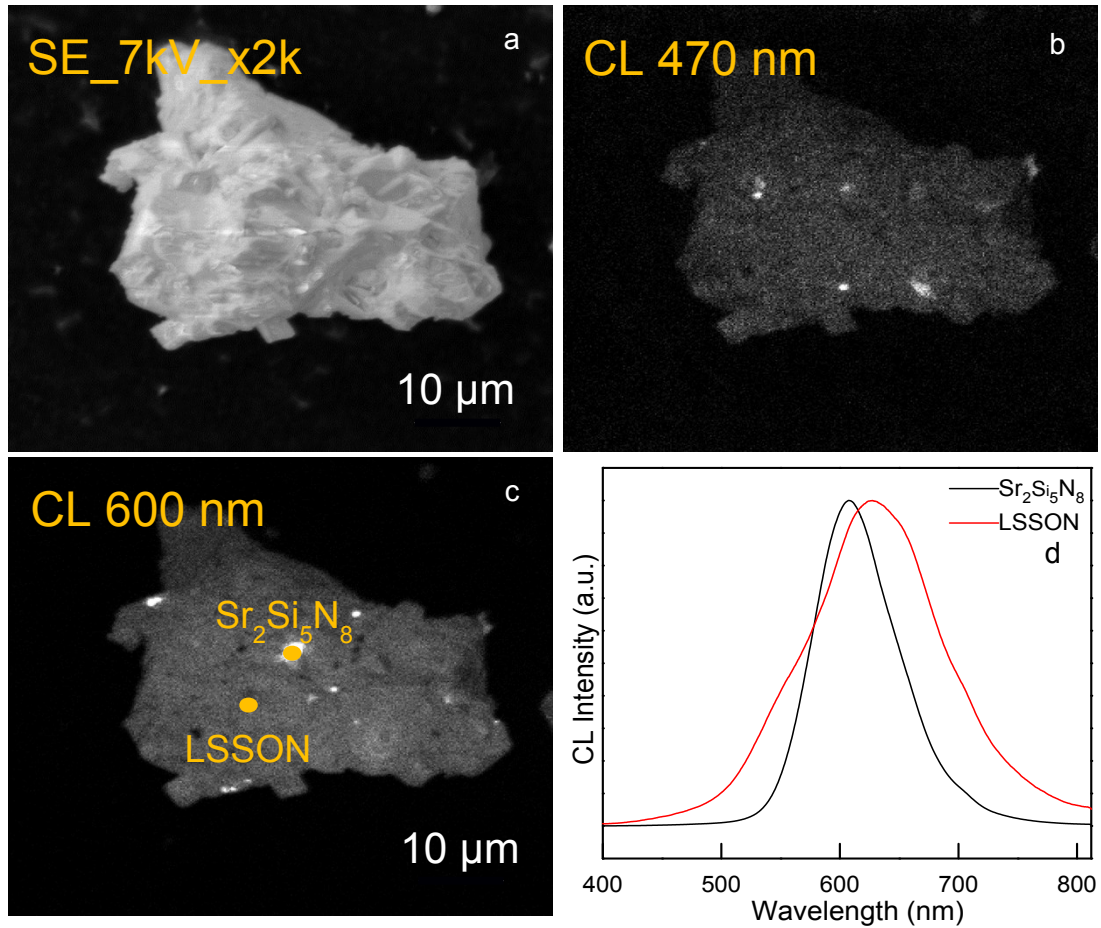

Figure S4. (a) SEM images; (b)-(c) CL mapping images at 470 nm and 600 nm; (d) CL point spectra of particles marked Sr<sub>2</sub>Si<sub>5</sub>N<sub>8</sub> and LSSON in Figure S4(C).

(a)

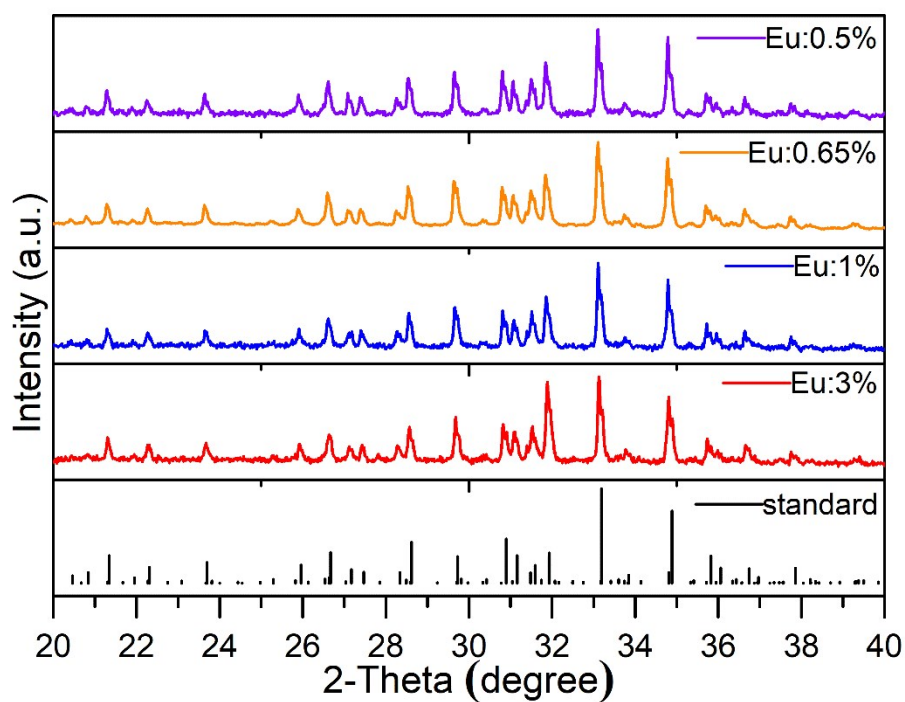

(b)

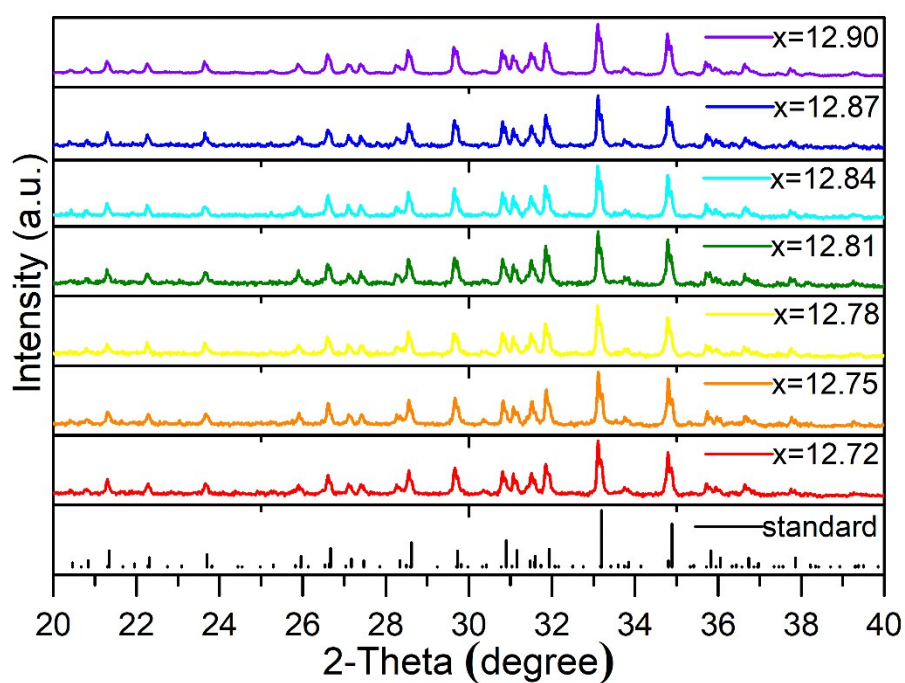

Figure S5. (a) XRD patterns of  $\text{La}_{13.1}\text{Sr}_{12.9}\text{Si}_{41}\text{O}_{13.9}\text{N}_{67.1}:\text{yEu}^{2+}$  ( $\text{y} = 0.5\%-3\%$ ); (b) XRD patterns of  $\text{La}_{26-x}\text{Sr}_x\text{Si}_{41}\text{O}_{x+1}\text{N}_{80-x}:\text{0.65\%Eu}^{2+}$  ( $x = 12.72-12.90$ ).



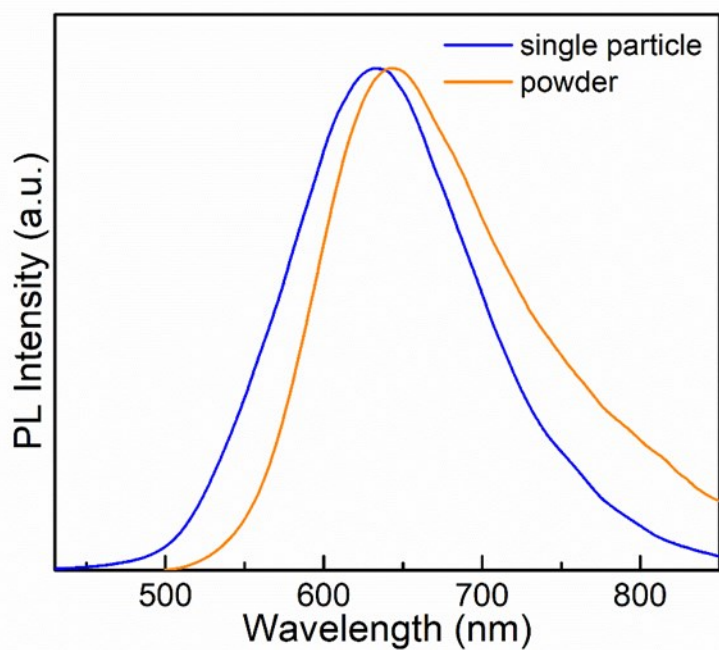

Figure S6. PL emission spectrum of single particle and phosphor powders.

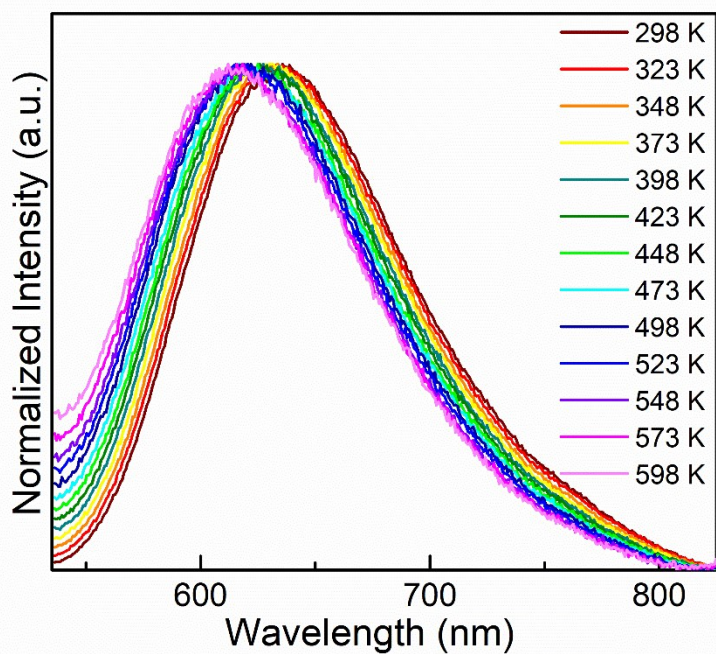

Figure S7. Normalized temperature-dependent emission spectra of LSSON:0.65%Eu<sup>2+</sup> under the excitation of 450 nm.

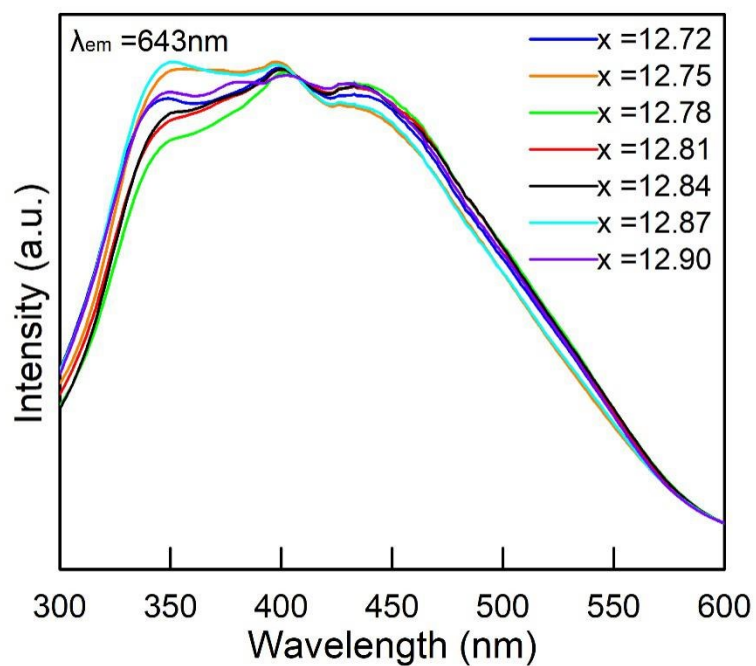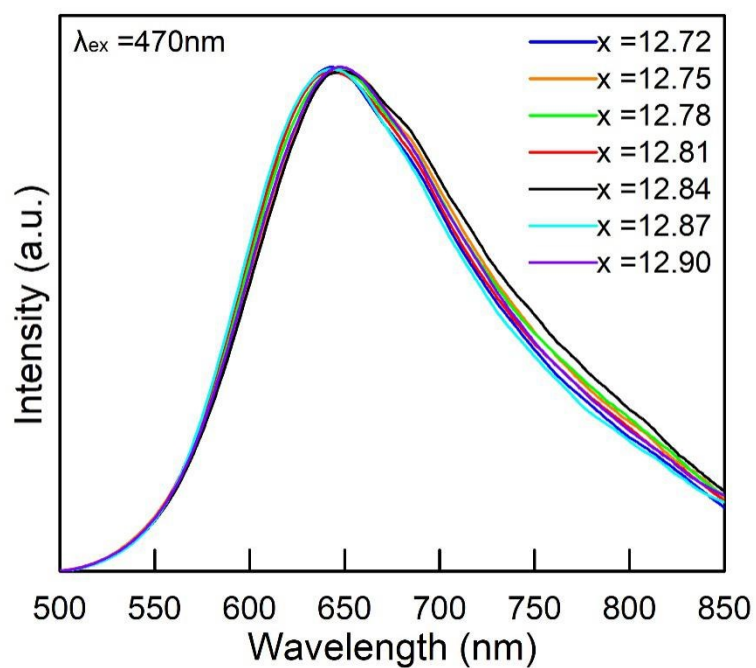

Figure S8. Normalized excitation and emission spectra of  $\text{La}_{26-x}\text{Sr}_x\text{Si}_{41}\text{O}_{x+1}\text{N}_{80-x}:\text{0.65\%Eu}^{2+}$  ( $x = 12.72-12.90$ ).

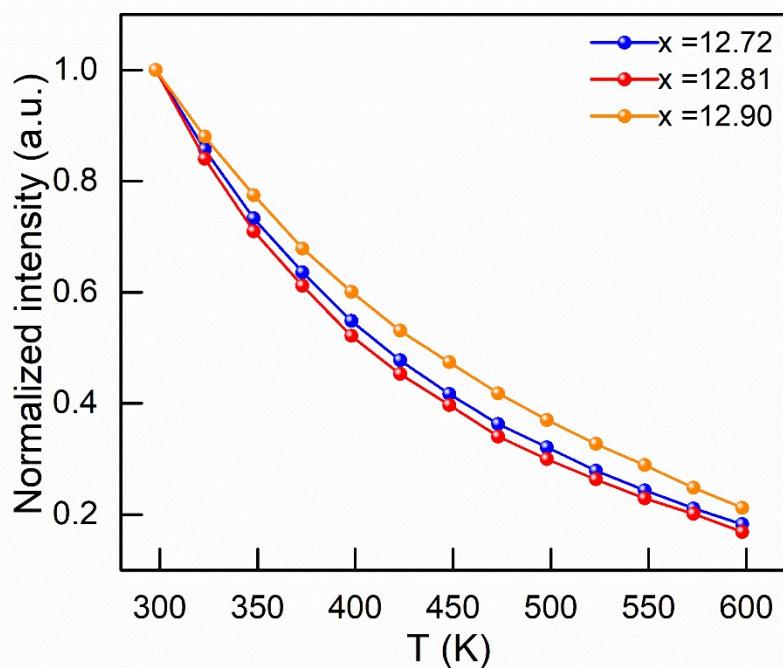

Figure S9. Temperature-dependent integrated emission intensities of  $\text{La}_{26-x}\text{Sr}_x\text{Si}_{41}\text{O}_{x+1}\text{N}_{80-x}:\text{0.65\%Eu}^{2+}$  ( $x = 12.72, 12.81, 12.90$ ) under the excitation of 450 nm.

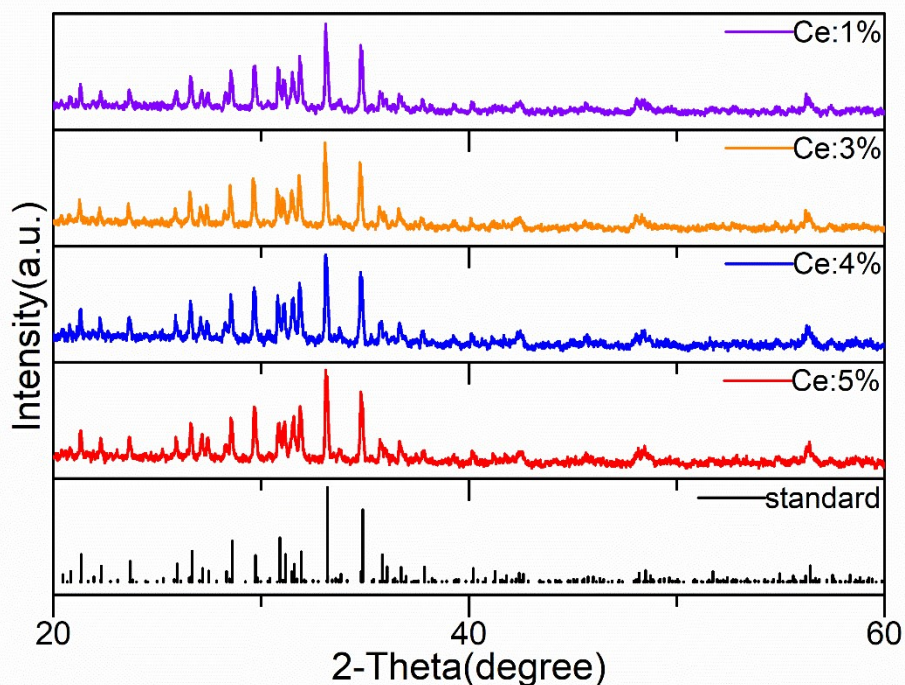

Figure S10. XRD patterns of  $\text{La}_{13.1}\text{Sr}_{12.9}\text{Si}_{41}\text{O}_{13.9}\text{N}_{67.1}:z\text{Ce}^{3+}$  ( $z = 1\%-5\%$ ).

Table S1 Atomic occupancies, coordinates and isotropic atomic



displacement parameters of  $(\text{La}_{26-x}\text{Sr}_x)\text{Si}_{41}(\text{O}_{1+x}\text{N}_{80-x})\text{:Eu}^{2+}$

| Atom    | Occupancy           | x           | y           | z           | $U_{\text{eq}} / \text{\AA}^2$ |
|---------|---------------------|-------------|-------------|-------------|--------------------------------|
| La1     | 1/0                 | 0.666667    | 0.333333    | 0.22115(12) | 0.0193(4)                      |
| La/Sr2  | 0.62(3)/0.38(3)     | 0.18831(14) | 0.25993(14) | 0.5         | 0.0121(6)                      |
| La/Sr3a | 0.429(4)/0.448(4)   | 0.17124(18) | 0.0260(2)   | 0           | 0.0154(6)                      |
| La/Sr3b | 0.061(4)/0.063(4)   | 0.0181(14)  | 0.1608(17)  | 0           | 0.0154(6)                      |
| La/Sr4a | 0.348(14)/0.391(15) | 0.4967(7)   | 0.1308(7)   | 0           | 0.0231(17)                     |
| La/Sr4b | 0.123(14)/0.138(15) | 0.5413(17)  | 0.1547(8)   | 0           | 0.016(4)                       |
| La/Sr5  | 0.78(2)/0.22(2)     | 0.23656(8)  | 0.42936(8)  | 0.29423(6)  | 0.0130(4)                      |
| La/Sr6  | 0.61(4)/0.39(4)     | 0           | 0           | 0.22477(11) | 0.0134(7)                      |
| La/Sr7  | 0.60(4)/0.40(4)     | 0.333333    | 0.666667    | 0.22263(11) | 0.0126(7)                      |
| La/Sr8  | 0.68(2)/0.32(2)     | 0.31403(8)  | 0.46639(9)  | 0.11126(6)  | 0.0114(4)                      |
| La/Sr9  | 0.59(2)/0.41(2)     | 0.01233(10) | 0.32967(9)  | 0.21895(6)  | 0.0116(4)                      |
| La/Sr10 | 0.67(2)/0.33(2)     | 0.23787(9)  | 0.13841(10) | 0.28689(7)  | 0.0134(4)                      |
| La/Sr11 | 0.83(2)/0.17(2)     | 0.44899(9)  | 0.31756(8)  | 0.11559(6)  | 0.0136(4)                      |
| La/Sr12 | 0.50(2)/0.50(2)     | 0.54214(12) | 0.10557(11) | 0.27616(7)  | 0.0212(5)                      |
| La/Sr13 | 0.75(2)/0.25(2)     | 0.18712(9)  | 0.21006(9)  | 0.11689(6)  | 0.0141(4)                      |
| La/Sr14 | 0.79(3)/0.21(3)     | 0.41570(14) | 0.23156(16) | 0.5         | 0.0167(6)                      |
| La/Sr15 | 0.22(3)/0.78(3)     | 0.15227(18) | 0.51717(18) | 0           | 0.0156(8)                      |
| Sr16    | 0/1                 | 0.0171(2)   | 0.3389(2)   | 0.5         | 0.0149(5)                      |
| La/Sr17 | 0.07(6)/0.93(6)     | 0.666667    | 0.333333    | 0.5         | 0.028(2)                       |
| La/Sr18 | 0.14(3)/0.86(3)     | 0.0893(2)   | 0.5799(2)   | 0.5         | 0.0261(10)                     |
| La/Sr19 | 0.06(6)/0.94(6)     | 0.333333    | 0.666667    | 0.5         | 0.0237(18)                     |
| Sr20    | 0/1                 | 0.3721(2)   | 0.34848(18) | 0.38013(12) | 0.0302(6)                      |
| Sr21    | 0/0.3333            | 0.0403(9)   | 0.0011(8)   | 0.5         | 0.026(2)                       |
| Si1     | 1                   | 0.1002(4)   | 0.5583(4)   | 0.2580(2)   | 0.0077(8)                      |
| Si2     | 1                   | 0           | 0           | 0.0761(4)   | 0.0078(14)                     |
| Si3     | 1                   | 0.0134(5)   | 0.5843(5)   | 0           | 0.0063(11)                     |
| Si4     | 1                   | 0.1688(4)   | 0.0101(4)   | 0.1474(2)   | 0.0088(9)                      |
| Si5     | 1                   | 0.0455(4)   | 0.4463(4)   | 0.3653(2)   | 0.0061(8)                      |
| Si6     | 1                   | 0.5117(4)   | 0.1724(4)   | 0.1380(2)   | 0.0095(9)                      |
| Si7     | 1                   | 0.1684(4)   | 0.5046(4)   | 0.1490(2)   | 0.0075(8)                      |
| Si8     | 1                   | 0.3103(7)   | 0.2319(7)   | 0           | 0.0131(14)                     |
| Si9     | 1                   | 0.2217(4)   | 0.1002(4)   | 0.4279(2)   | 0.0055(8)                      |
| Si10    | 1                   | 0.4509(4)   | 0.2338(4)   | 0.2554(2)   | 0.0084(9)                      |
| Si11    | 1                   | 0.2112(7)   | 0.3376(7)   | 0           | 0.0109(13)                     |
| Si12    | 1                   | 0.333333    | 0.666667    | 0.0739(4)   | 0.0073(14)                     |
| Si13    | 1                   | 0.0647(4)   | 0.2853(4)   | 0.3740(2)   | 0.0070(8)                      |

|       |           |            |            |            |            |
|-------|-----------|------------|------------|------------|------------|
| Si14  | 1         | 0.3844(4)  | 0.1194(4)  | 0.3618(2)  | 0.0061(8)  |
| Si15  | 1         | 0.5381(4)  | 0.1208(4)  | 0.4311(2)  | 0.0065(8)  |
| Si16  | 1         | 0.2172(4)  | 0.6176(4)  | 0.3645(2)  | 0.0055(8)  |
| Si17  | 1         | 0.0161(4)  | 0.4798(4)  | 0.1281(4)  | 0.0104(9)  |
| Si18  | 1         | 0.3338(4)  | 0.3340(4)  | 0.2294(2)  | 0.0081(8)  |
| Si19  | 1         | 0.0590(4)  | 0.3330(4)  | 0.0694(4)  | 0.0115(9)  |
| Si20  | 1         | 0.1177(4)  | 0.2243(4)  | 0.2627(2)  | 0.0096(9)  |
| Si21  | 1         | 0.0650(4)  | 0.1144(4)  | 0.3738(2)  | 0.0073(8)  |
| Si22  | 1         | 0.2126(4)  | 0.4599(4)  | 0.4302(2)  | 0.0075(8)  |
| Si23  | 1         | 0.666667   | 0.333333   | 0.0731(4)  | 0.0076(14) |
| Si24  | 1         | 0.5523(4)  | 0.2917(4)  | 0.3733(2)  | 0.0079(8)  |
| N/O1  | 0.83/0.17 | 0          | 0          | 0.3902(13) | 0.011(5)   |
| N/O2  | 0.83/0.17 | 0.0745(11) | 0.4216(11) | 0.1122(8)  | 0.012(3)   |
| N/O3  | 0.83/0.17 | 0.5022(13) | 0.0180(13) | 0.3991(9)  | 0.017(3)   |
| N/O4  | 0.83/0.17 | 0.2335(13) | 0.2789(14) | 0.2635(9)  | 0.019(3)   |
| N/O5  | 0.83/0.17 | 0.215(2)   | 0.501(2)   | 0.5        | 0.026(6)   |
| N/O6  | 0.83/0.17 | 0.666667   | 0.333333   | 0.3850(14) | 0.014(5)   |
| N/O7  | 0.83/0.17 | 0.666667   | 0.333333   | 0          | 0.06(2)    |
| N/O8  | 0.83/0.17 | 0.3200(13) | 0.1610(13) | 0.3908(9)  | 0.016(3)   |
| N/O9  | 0.83/0.17 | 0.3190(14) | 0.5024(13) | 0.4026(9)  | 0.019(4)   |
| N/O10 | 0.83/0.17 | 0.3368(10) | 0.0061(10) | 0.3841(7)  | 0.007(2)   |
| N/O11 | 0.83/0.17 | 0.4086(16) | 0.3281(17) | 0          | 0.013(4)   |
| N/O12 | 0.83/0.17 | 0.1587(10) | 0.5066(10) | 0.3857(7)  | 0.008(2)   |
| N/O13 | 0.83/0.17 | 0.0073(11) | 0.1716(10) | 0.3961(7)  | 0.009(2)   |
| N/O14 | 0.83/0.17 | 0.2028(10) | 0.6187(10) | 0.2884(7)  | 0.009(2)   |
| N/O15 | 0.83/0.17 | 0          | 0          | 0          | 0.008(6)   |
| N/O16 | 0.83/0.17 | 0.1520(9)  | 0.3450(9)  | 0.4208(7)  | 0.006(2)   |
| N/O17 | 0.83/0.17 | 0.3877(11) | 0.1243(11) | 0.2848(8)  | 0.011(3)   |
| N/O18 | 0.83/0.17 | 0.0820(11) | 0.1236(11) | 0.2970(8)  | 0.013(3)   |
| N/O19 | 0.83/0.17 | 0.0458(11) | 0.4548(11) | 0.2877(8)  | 0.011(3)   |
| N/O20 | 0.83/0.17 | 0.3234(11) | 0.3429(11) | 0.1563(8)  | 0.012(3)   |
| N/O21 | 0.83/0.17 | 0.1582(13) | 0.1498(13) | 0.4174(9)  | 0.016(3)   |
| N/O22 | 0.83/0.17 | 0.3917(13) | 0.4307(13) | 0.2688(8)  | 0.016(3)   |
| N/O23 | 0.83/0.17 | 0.333333   | 0.666667   | 0.3791(13) | 0.008(4)   |
| N/O24 | 0.83/0.17 | 0.5243(13) | 0.3453(13) | 0.4260(8)  | 0.016(3)   |
| N/O25 | 0.83/0.17 | 0.6068(13) | 0.2231(13) | 0.1003(8)  | 0.015(3)   |
| N/O26 | 0.83/0.17 | 0.5049(11) | 0.0779(11) | 0.1667(7)  | 0.011(3)   |
| N/O27 | 0.83/0.17 | 0.343(2)   | 0.333(2)   | 0.5        | 0.018(5)   |

|       |           |            |            |            |          |
|-------|-----------|------------|------------|------------|----------|
| N/028 | 0.83/0.17 | 0.1074(11) | 0.5504(11) | 0.1785(8)  | 0.012(3) |
| N/029 | 0.83/0.17 | 0.0823(13) | 0.2892(13) | 0.3019(8)  | 0.014(3) |
| N/030 | 0.83/0.17 | 0.4956(11) | 0.1769(11) | 0.3866(7)  | 0.011(3) |
| N/031 | 0.83/0.17 | 0.316(2)   | 0.426(2)   | 0          | 0.018(5) |
| N/032 | 0.83/0.17 | 0.2147(17) | 0.2388(17) | 0          | 0.013(4) |
| N/033 | 0.83/0.17 | 0.2493(18) | 0.1001(18) | 0.5        | 0.016(4) |
| N/034 | 0.83/0.17 | 0.333333   | 0.666667   | 0          | 0.023(9) |
| N/035 | 0.83/0.17 | 0.2140(15) | 0.4667(15) | 0.1949(11) | 0.025(4) |
| N/036 | 0.83/0.17 | 0.1590(13) | 0.3372(13) | 0.0659(9)  | 0.017(3) |
| N/037 | 0.83/0.17 | 0.2598(13) | 0.0205(13) | 0.1057(9)  | 0.019(3) |
| N/038 | 0.83/0.17 | 0.021(2)   | 0.337(2)   | 0          | 0.020(5) |
| N/039 | 0.83/0.17 | 0.0138(14) | 0.5281(14) | 0.0639(9)  | 0.020(3) |
| N/040 | 0.83/0.17 | 0.5140(14) | 0.2353(14) | 0.1963(10) | 0.021(4) |
| N/041 | 0.83/0.17 | 0.2388(16) | 0.5771(15) | 0.0973(11) | 0.025(4) |
| N/042 | 0.83/0.17 | 0.0119(15) | 0.0981(15) | 0.0988(11) | 0.025(4) |
| N/043 | 0.83/0.17 | 0.2943(14) | 0.1699(14) | 0.0617(10) | 0.022(4) |
| N/044 | 0.83/0.17 | 0.504(2)   | 0.136(2)   | 0.5        | 0.029(7) |
| N/045 | 0.83/0.17 | 0.4262(16) | 0.1544(16) | 0.0920(11) | 0.026(4) |
| N/046 | 0.83/0.17 | 0.5358(15) | 0.3075(15) | 0.3000(10) | 0.023(4) |
| N/047 | 0.83/0.17 | 0.1850(17) | 0.0951(17) | 0.1885(11) | 0.029(5) |
| N/048 | 0.83/0.17 | 0.0769(17) | 0.2118(17) | 0.1917(13) | 0.031(5) |
| N/049 | 0.83/0.17 | 0.386(2)   | 0.272(2)   | 0.2356(14) | 0.039(6) |

---
